# Supplementary material for: One-pot synthesis of mesoporous spherical SnO2@graphene for high-sensitivity formaldehyde gas sensors
Source: Royal Society of Chemistry journal article supplement (doi:10.1039/c6ra00857g), 2016-01-01
Supplement: c6ra00857g1.pdf [file c6ra00857g1.pdf]

## Supporting Information

# One-pot Synthesis of Mesoporous Spherical SnO<sub>2</sub>@Graphene for High Sensitivity Formaldehyde Gas Sensors

*Shuai Chen,<sup>a</sup> Yan Qiao,<sup>a,d</sup> Jianlin Huang,<sup>c</sup> Huanli Yao,<sup>b</sup> Yuanli Zhang,<sup>a</sup> Yuan Li,<sup>a</sup>*

*Jianping Du,<sup>\*b</sup> and Weibin Fan<sup>\*a,d</sup>*

<sup>a</sup>Analytical Instrumentation Center, Institute of Coal Chemistry, Chinese Academy of Sciences, Taiyuan 030001, P. R. China

<sup>b</sup>College of Chemistry and Chemical Engineering, Taiyuan University of Technology, Taiyuan 030024, P. R. China

<sup>c</sup>New Energy Research Institute, School of Environment and Energy, South China University of Technology, Guangzhou 510006, P. R. China

<sup>d</sup>State Key Laboratory of Coal Conversion, Institute of Coal Chemistry, Chinese Academy of Science, Taiyuan 030001, P. R. China.

## The structure characterization of graphene and SnO<sub>2</sub>

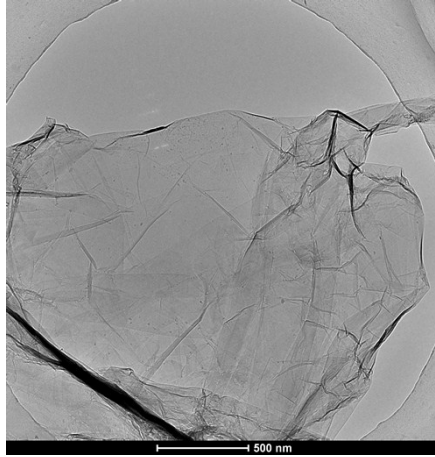

Fig. S1 TEM image of Graphene

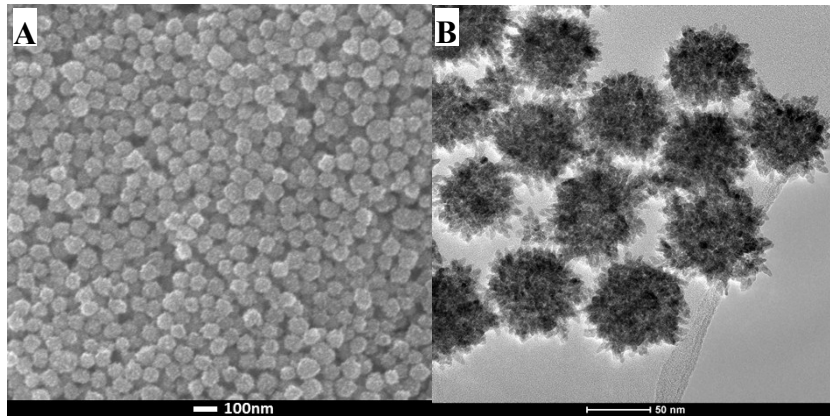

Fig. S2 SEM image (A) and TEM image (B) of mSnO<sub>2</sub>

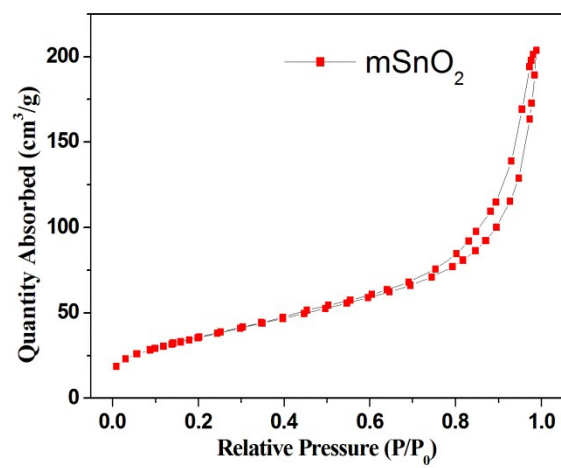

Fig. S3 N<sub>2</sub> adsorption-desorption isotherms of mSnO<sub>2</sub>
